# Supplementary material for: Hexokinase 3 dysfunction promotes tumorigenesis and immune escape by upregulating monocyte/macrophage infiltration into the clear cell renal cell carcinoma microenvironment
Source: PubMed Central journal article supplement (PMC8241725; doi:10.7150/ijbs.58295), 2021-06-01
Supplement: ijbsv17p2205s1.pdf [file ijbsv17p2205s1.pdf]

1 **Supplementary Figure 1.** Univariate Cox analysis suggested pathological TNM stage, AJCC stages, ISUP  
2 grade and HK3 expression as prognostic indicators in 533 ccRCC patients from TCGA cohort.

3

4 **Supplementary Figure 2.** *HK3* plays an important role in the immune microenvironment of various  
5 cancers.

6

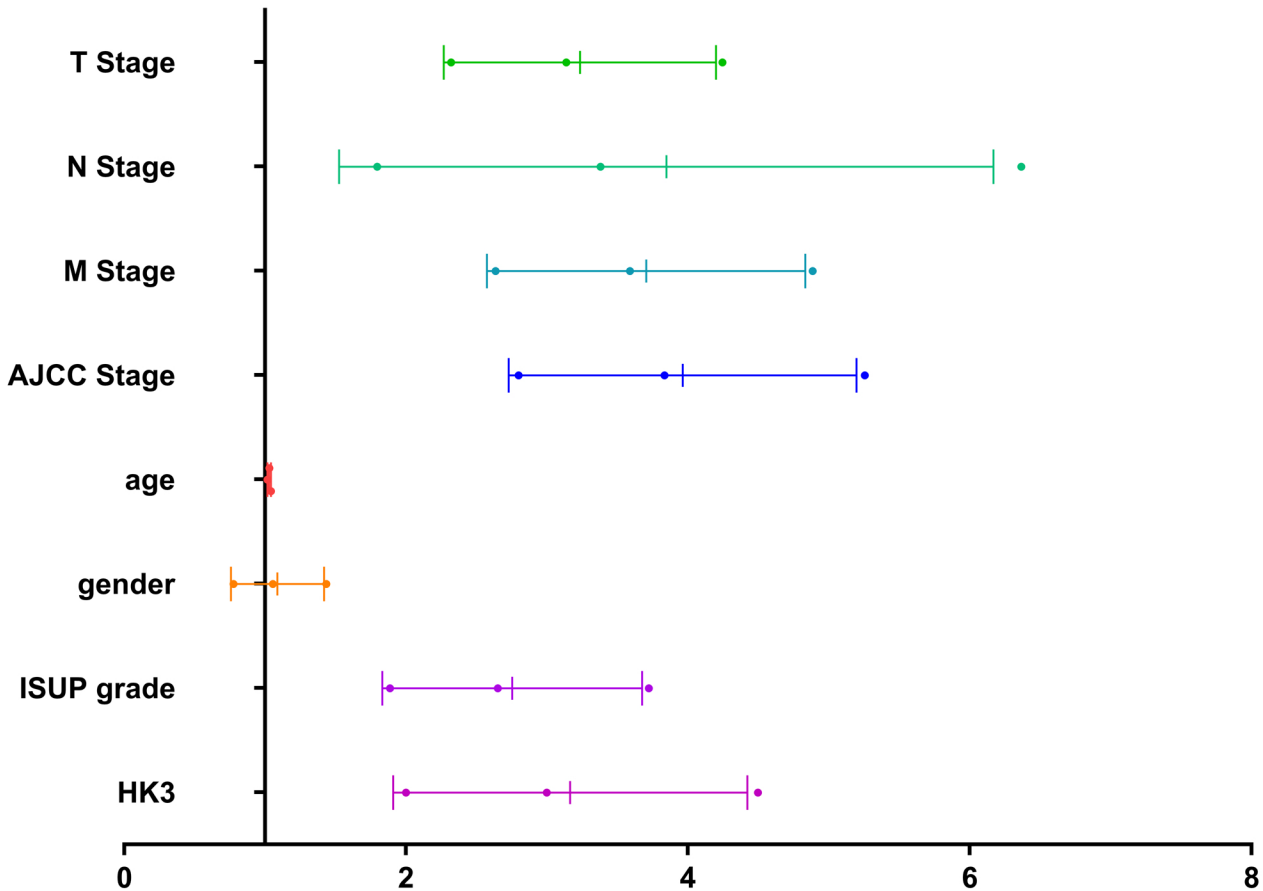

**A**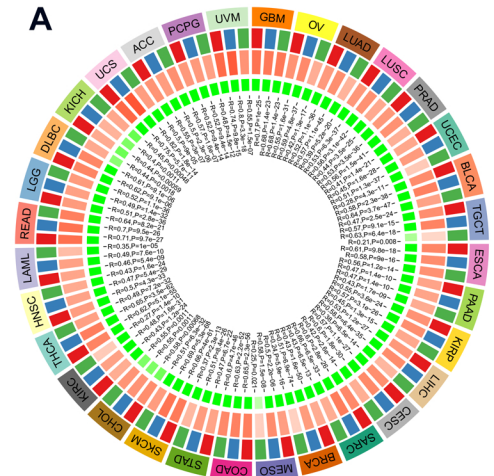**B**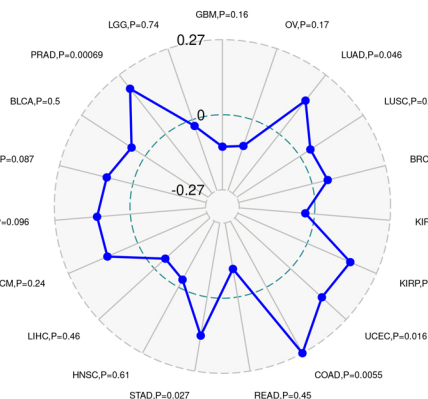**C**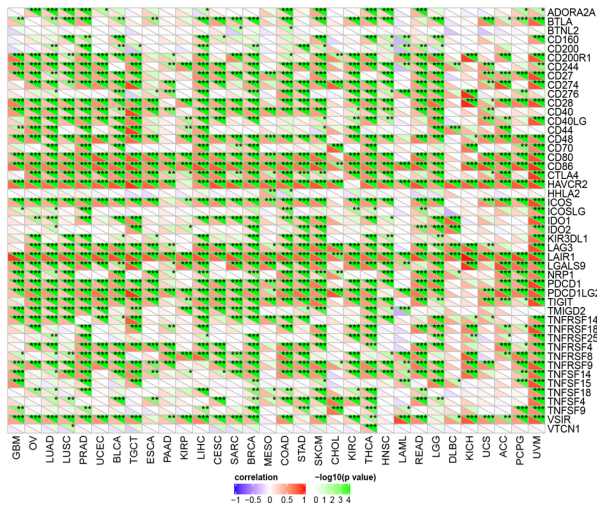**D**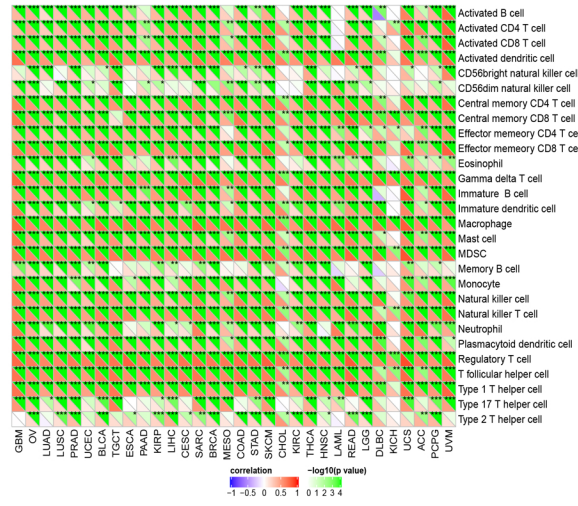

**Supplementary Table 1.** Univariate Cox logistic regression analysis of PFS and OS in 377 ccRCC patients from FUSCC cohort (PFS: progression-free survival; OS: overall survival; ccRCC: clear cell renal cell carcinoma; FUSCC: Fudan University Shanghai Cancer Center)

| Covariates                | PFS   |              |                  | OS     |              |                  |
|---------------------------|-------|--------------|------------------|--------|--------------|------------------|
|                           | HR    | 95% CI       | <i>P</i> value   | HR     | 95% CI       | <i>P</i> value   |
| Age                       | 1.013 | 1.001-1.025  | <b>0.029</b>     | 1.015  | 1.002-1.028  | <b>0.027</b>     |
| Lateral                   | 1.029 | 0.783-1.352  | 0.838            | 0.981  | 0.719-1.339  | 0.903            |
| BMI                       | 0.905 | 0.813-1.051  | 0.091            | 0.947  | 0.886-1.011  | 0.076            |
| pT stage (ref. T1-T2)     | 6.555 | 4.790-8.970  | <b>&lt;0.001</b> | 7.968  | 5.689-11.160 | <b>&lt;0.001</b> |
| pN stage (ref. N0)        | 7.810 | 5.444-11.204 | <b>&lt;0.001</b> | 8.929  | 6.052-13.174 | <b>&lt;0.001</b> |
| pM stage (ref. M0)        | 7.864 | 5.732-10.790 | <b>&lt;0.001</b> | 10.197 | 7.204-14.433 | <b>&lt;0.001</b> |
| AJCC stage (ref. I-II)    | 9.670 | 7.027-13.307 | <b>&lt;0.001</b> | 12.994 | 9.066-18.624 | <b>&lt;0.001</b> |
| ISUP grade (ref. 1-2)     | 2.742 | 2.049-3.670  | <b>&lt;0.001</b> | 3.370  | 2.372-4.788  | <b>&lt;0.001</b> |
| HK3 expression (ref. Low) | 2.852 | 2.131-3.817  | <b>&lt;0.001</b> | 2.999  | 1.999-4.497  | <b>&lt;0.001</b> |
